# Supplementary material for: All-atom molecular dynamics simulation of HPMA polymers
Source: Royal Society of Chemistry journal article supplement (doi:10.1039/c3ra46386a), 2013-12-19
Supplement: c3ra46386a.pdf [file c3ra46386a.pdf]

**Supporting information for “All-Atom molecular dynamics simulation of HPMA polymers” Glib Meleshko, Jiri Kulhavy, Alison Paul\*, David J. Willock\*, James A. Platts\***

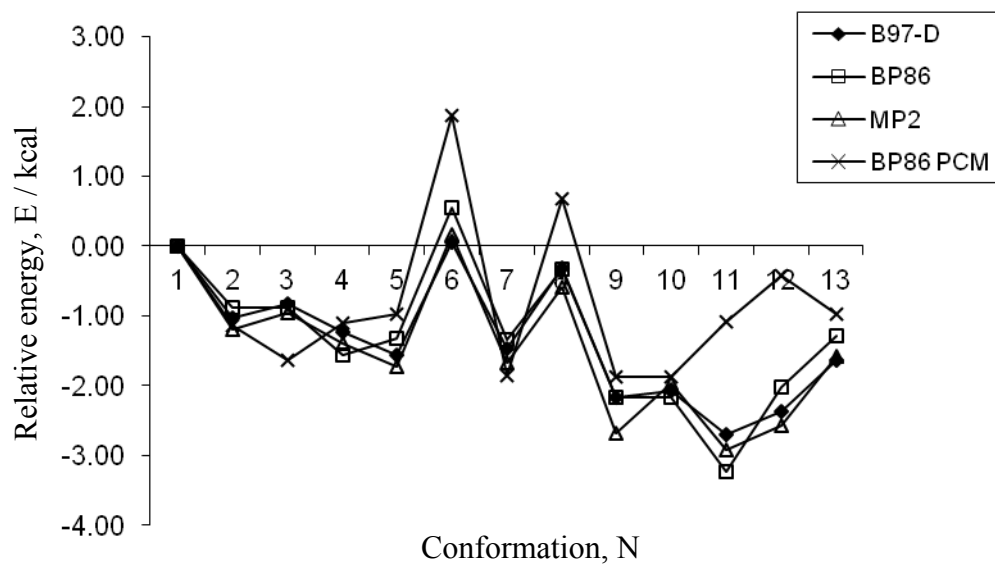

Figure S1. Results of total energies calculations for DFT and *ab-initio* methods

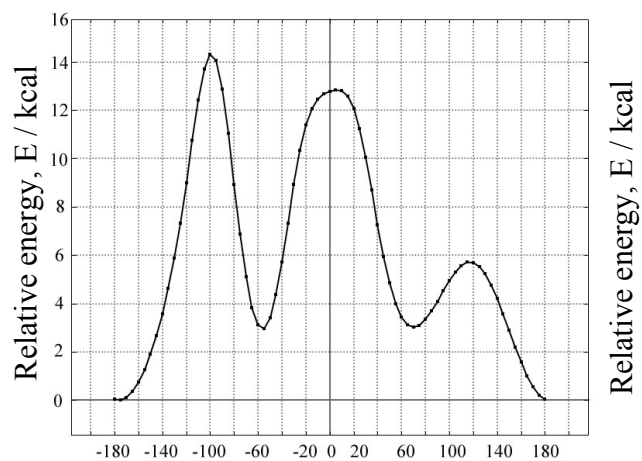

Relative energy, E / kcal

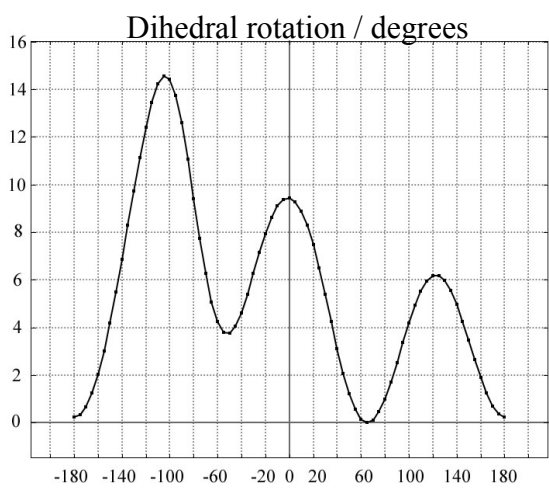

Dihedral rotation / degrees

(a)

(b)

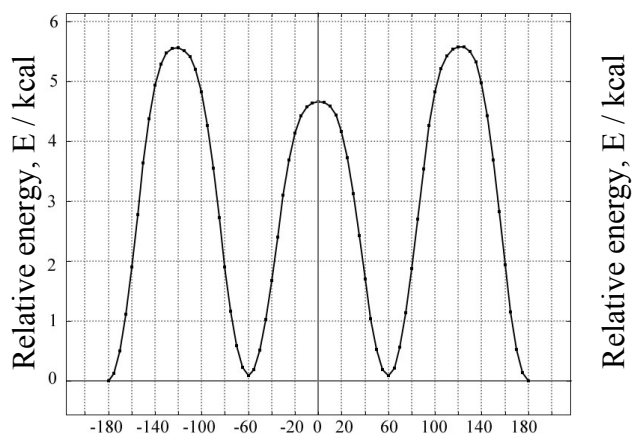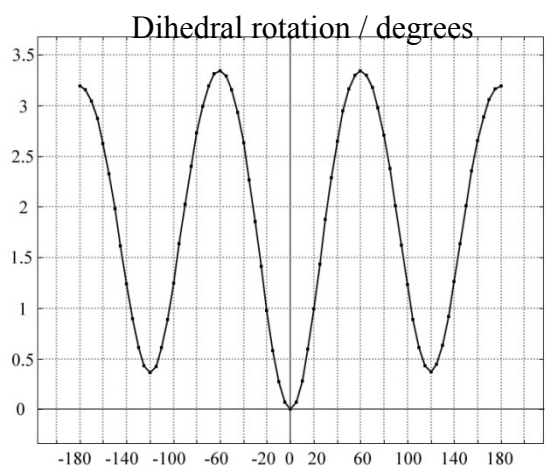

(c)

(d)

Figure S2. Dihedral energies plots of 1 C-C bond a – MMFF94, b – OPLS-aa, 2 C-C bond c – MMFF94, d – OPLS-aa

Table S1: Number of repeats used for averages in Table 1

| <b>Monomer</b> | <b>Average sampling</b> |
|----------------|-------------------------|
| HPMA-20        | 6                       |
|                | 6                       |
|                | 5                       |
| HPMA-40        | 6                       |
|                | 4                       |
|                | 6                       |
| HPMA-60        | 3                       |
|                | 3                       |
|                | 4                       |
| HPMA-80        | 3                       |
|                | 5                       |
|                | 4                       |
| HPMA-100       | 3                       |
|                | 4                       |
|                | 3                       |
| HPMA-120       | 2                       |
|                | 3                       |
|                | 4                       |
| HPMA-140       | 3                       |
|                | 3                       |
|                | 3                       |
| HPMA-160       | 3                       |
|                | 3                       |
|                | 3                       |
| HPMA-180       | 2                       |
|                | 3                       |
|                | 3                       |
| HPMA-200       | 2                       |
|                | 2                       |
|                | 2                       |
| HPMA-220       | 2                       |
|                | 2                       |
|                | 2                       |

|          |   |
|----------|---|
| HPMA-265 | 2 |
|          | 2 |
|          | 2 |
